# Supplementary material for: SMART transfer method to directly compare the mechanical response of water-supported and free-standing ultrathin polymeric films
Source: PubMed Central journal article supplement (PMC8058343; doi:10.1038/s41467-021-22473-w), 2021-04-20
Supplement: 41467_2021_22473_MOESM2_ESM.pdf [file 41467_2021_22473_MOESM2_ESM.pdf]

## **Description of Additional Supplementary Files**

File Name: Supplementary Movie 1

Description: Vertical lift of a 60 nm PS film off a water surface and subsequent failure.

File Name: Supplementary Movie 2

Description: : Smart process used to obtain and characterize a 34 nm freestanding PS film with gauge length of 8 mm.

File Name: Supplementary Movie 3

Description: : Free-standing tensile test of 19 nm polystyrene with a gauge length of 4 mm.
